# Supplementary material
Source: publisher site journal article supplement (https://www.dovepress.com/article/417007)

**Supplementary Material**

**Development and validation of a nomogram to predict significant liver inflammation in patients with chronic hepatitis B**

Suling Jiang, Jian Wang, Zhiyi Zhang, Jie Zhan, Ruifei Xue, Yuanwang Qiu, Li Zhu, Shaoqiu Zhang, Yifan Pan, Xiaomin Yan, Yuxin Chen, Jie Li, Xingxiang Liu, Chuanwu Zhu, Rui Huang, Chao Wu

**Table S1. Logistic regression analysis of independent factors associated with significant liver inflammation in the development set.**

| **Exploratory factors** | **OR** | **Lower 95% limit of OR** | **Upper 95% limit of OR** | **P value** |
| --- | --- | --- | --- | --- |
| ALT (U/L) | 1.000 | 1.001 | 1.009 | 0.018 |
| GGT (U/L) | 1.010 | 1.001 | 1.013 | 0.013 |
| PT (s) | 1.380 | 1.192 | 1.588 | 0.001 |
| HBV DNA (log10 IU/mL) | 1.170 | 1.015 | 1.352 | 0.030 |

Abbreviations: ALT, alanine aminotransferase; GGT, gamma-glutamyl transpeptidase; PT, prothrombin time; HBV, hepatitis B virus; OR, odds ratio.

**Table S2. Diagnostic accuracy of different indicators for the prediction of significant inflammation in patients with normal ALT in the development set and validation set.**

|  |  | **Optimized cut-off** | **AUC (95% CI)** | **P value*** | **Sensitivity (%)** | **Specificity (%)** | **PLR** | **NLR** |
| --- | --- | --- | --- | --- | --- | --- | --- | --- |
|  | **Development set** |  |  |  |  |  |  |  |
|  | **ULN of 40 U/L** |  |  |  |  |  |  |  |
|  | AGPD-nomogram | 17.622 | 0.703 (0.622-0.783) | - | 81.8 | 53.2 | 1.750 | 0.342 |
|  | ALT (U/L) | 23.900 | 0.608 (0.521-0.695) | 0.039 | 65.9 | 50.0 | 1.318 | 0.682 |
|  | **ULN of 35/25 U/L (Male/Female)** |  |  |  |  |  |  |  |
|  | AGPD-nomogram | 17.622 | 0.692 (0.594-0.790) | - | 75.9 | 60.1 | 1.901 | 0.402 |
|  | ALT (U/L) | 14.950 | 0.597 (0.497-0.697) | 0.084 | 96.6 | 21.6 | 1.232 | 0.159 |
|  | **ULN of 30/19 U/L (Male/Female)** |  |  |  |  |  |  |  |
|  | AGPD-nomogram | 17.622 | 0.643 (0.523-0.764) | - | 72.2 | 62.2 | 1.909 | 0.447 |
|  | ALT (U/L) | 14.950 | 0.610 (0.490-0.730) | 0.620 | 94.4 | 30.4 | 1.357 | 0.183 |
|  | **Validation set** |  |  |  |  |  |  |  |
|  | **ULN of 40 U/L** | 19.535 | 0.803 (0.707-0.898) | - | 83.3 | 67.3 | 2.552 | 0.247 |
|  | AGPD-nomogram | 25.950 | 0.546 (0.434-0.659) | < 0.001 | 62.5 | 50.3 | 1.259 | 0.745 |
|  | ALT (U/L) |  |  |  |  |  |  |  |
|  | **ULN of 35/25 U/L (Male/Female)** |  |  |  |  |  |  |  |
|  | AGPD-nomogram | 18.559 | 0.827 (0.718-0.935) | - | 94.4 | 65.4 | 2.731 | 0.085 |
|  | ALT (U/L) | 18.500 | 0.597 (0.462-0.733) | 0.005 | 77.8 | 39.3 | 1.280 | 0.566 |
|  | **ULN of 30/19 U/L (Male/Female)** |  |  |  |  |  |  |  |
|  | AGPD-nomogram | 18.818 | 0.803 (0.643-0.964) | - | 0.909 | 0.649 | 2.587 | 0.140 |
|  | ALT (U/L) | 19.500 | 0.633 (0.460-0.807) | 0.129 | 0.636 | 0.581 | 1.519 | 0.626 |

* Compared to AGPD-nomogram.

Abbreviations: ULN, upper limit of normal; ALT, alanine aminotransferase; AGPD, ALT- gamma-glutamyl transpeptidase - prothrombin time - hepatitis B virus DNA; AUC, area under the receiver operating characteristic curve; CI, confidence interval; NLR, negative likelihood ratio; PLR, positive likelihood ratio.

**Figure S1.** Correlations between nomogram scores and liver inflammation grades in the development set (A) and validation set (B). Distribution of nomogram scores in patients with and without significant liver inflammation of the development set (C) and validation set (D).

*** P < 0.001.


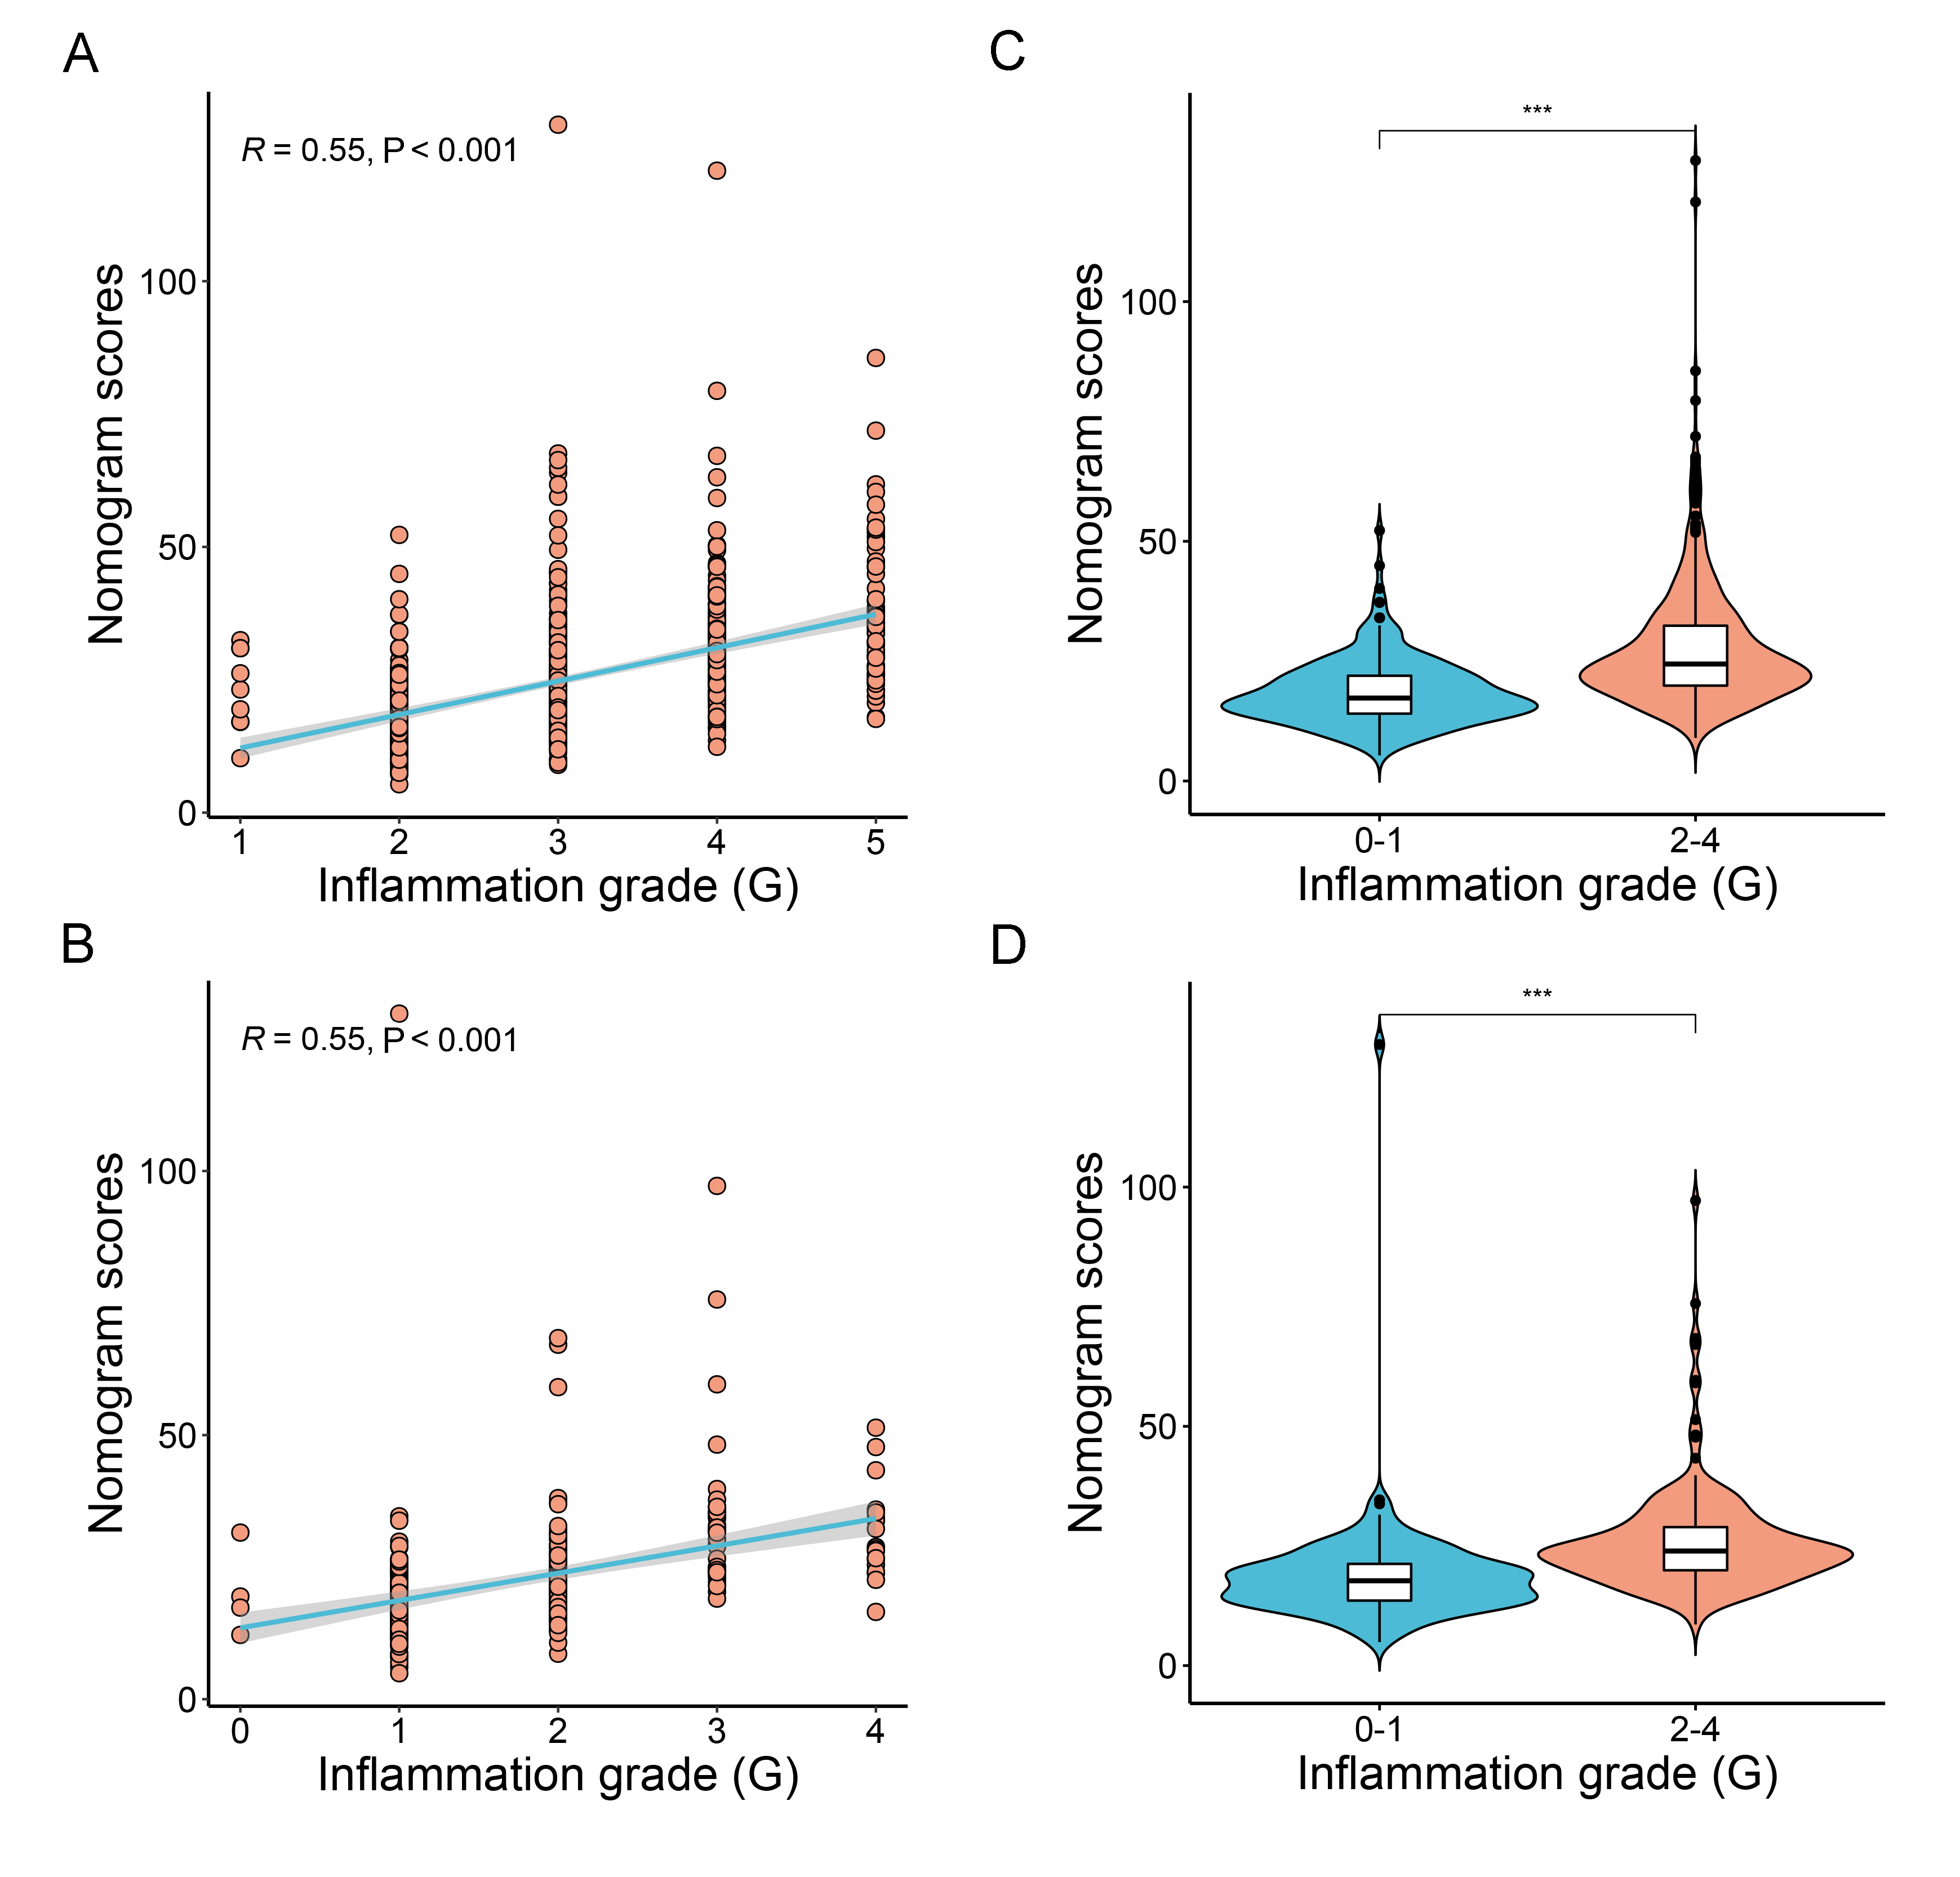


**Figure S2.** The ROCs for predicting significant liver inflammation in patients with normal ALT. Diagnose performance of nomogram and ALT under the ULN of 40 U/L in the development set (A) and validation set (B), the ULN of 35/25 U/L (Male/Female) in the development set (C) and validation set (D), and the ULN of 30/19 U/L (Male/Female) in the development set (E) and validation set (F).


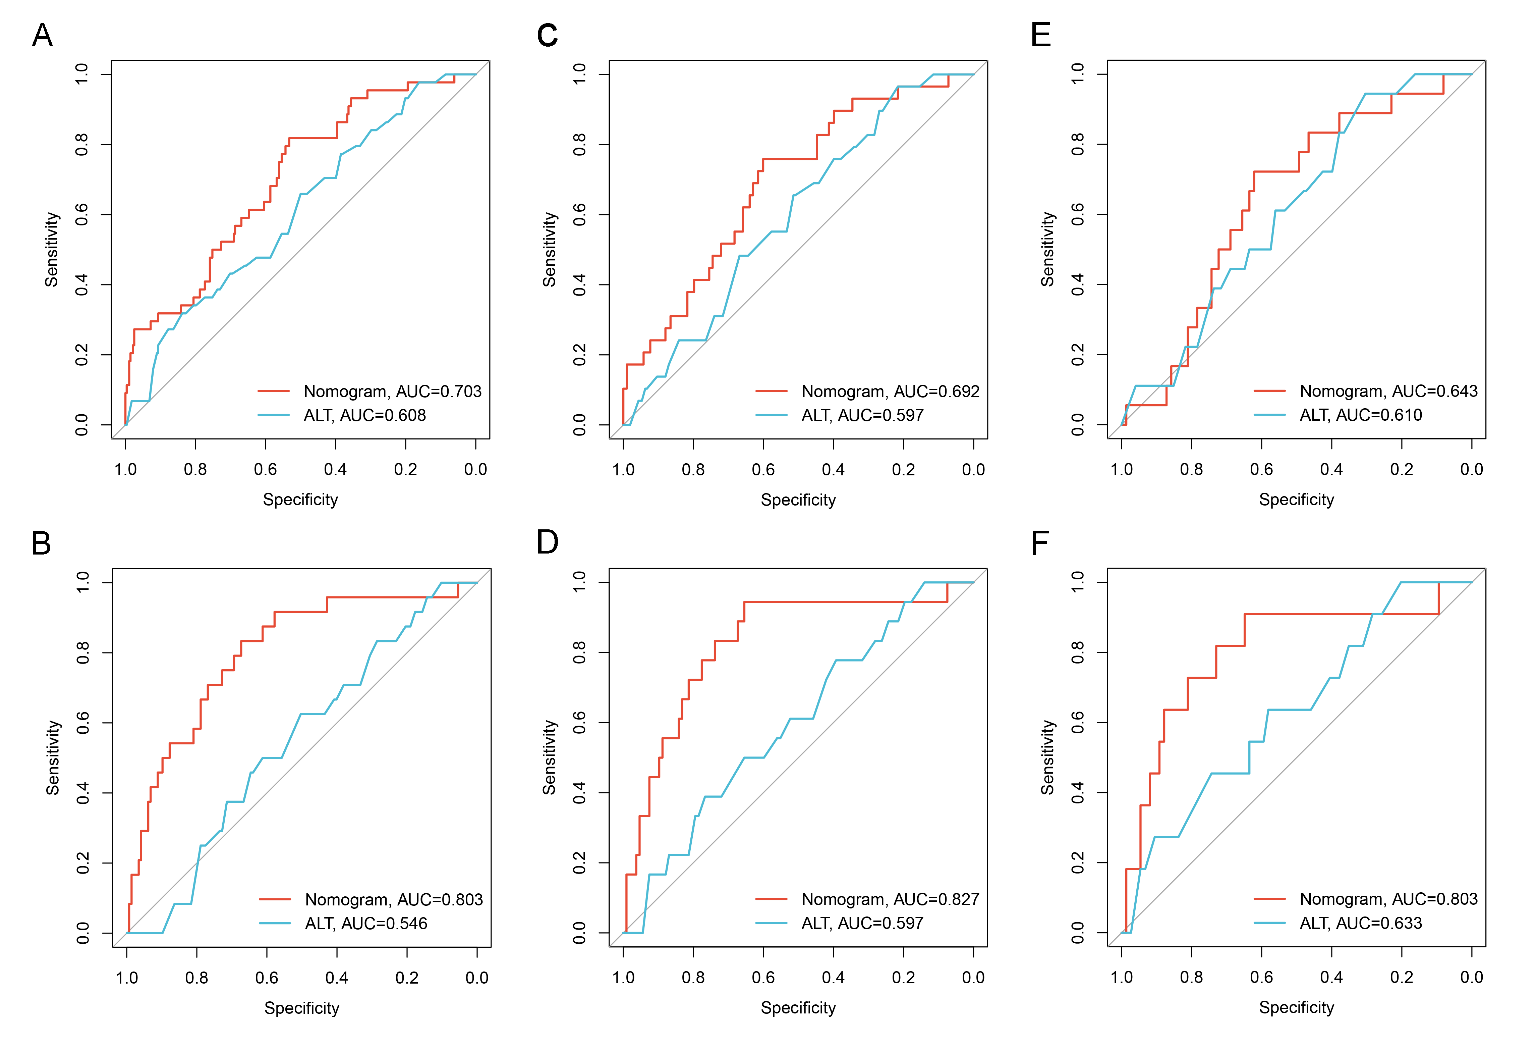

Supplement: Supplementary file 1 [file get_supplementary_file.php]
